# Supplementary material for: Precise identification of cancer cells from allelic imbalances in single cell transcriptomes
Source: PubMed Central journal article supplement (PMC9452529; doi:10.1038/s42003-022-03808-9), 2022-09-07
Supplement: 42003_2022_3808_MOESM1_ESM.pdf [file 42003_2022_3808_MOESM1_ESM.pdf]

Supplementary Information for

## **Precise identification of cancer cells from allelic imbalances in single cell transcriptomes**

Mi K. Trinh<sup>1</sup>, Clarissa N. Pacyna<sup>1</sup>, Gerda Kildisiute<sup>1</sup>, Christine Thevanesan<sup>3</sup>, Alice Piapi<sup>3</sup>, Kirsty Ambridge<sup>1</sup>, Nathaniel D. Anderson<sup>1</sup>, Eleonora Khabirova<sup>1</sup>, Elena Prigmore<sup>1</sup>, Karin Straathof<sup>3</sup>, Sam Behjati\*<sup>1,2,4</sup>, Matthew D. Young\*<sup>1</sup>

<sup>1</sup>Wellcome Sanger Institute, Wellcome Genome Campus, Hinxton, Cambridge CB10 1SA, UK.

<sup>2</sup>Cambridge University Hospitals NHS Foundation Trust, Cambridge, CB2 0QQ, UK.

<sup>3</sup>University College London Great Ormond Street Biomedical Research Centre, London, WC1E 6BT, UK.

<sup>4</sup>Department of Paediatrics, University of Cambridge; Cambridge, UK.

\*Correspondence: Matthew D. Young - [my4@sanger.ac.uk](mailto:my4@sanger.ac.uk), Sam Behjati - [sb31@sanger.ac.uk](mailto:sb31@sanger.ac.uk)

## Supplementary Figures

# alleleIntegrator

# CopyKAT

Renal Cell Carcinoma

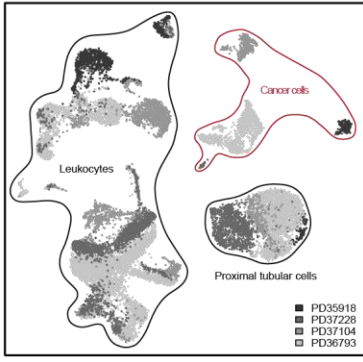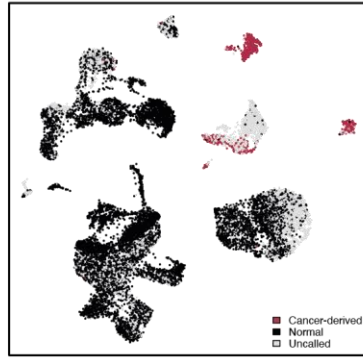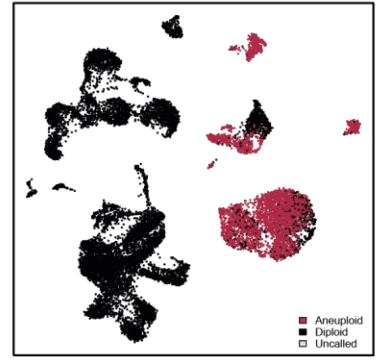

UMAP 2

Neuroblastoma

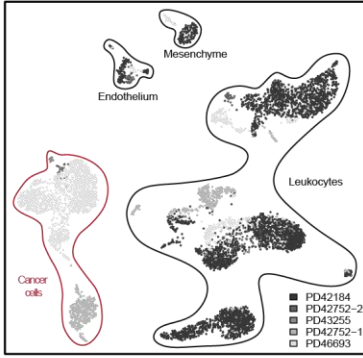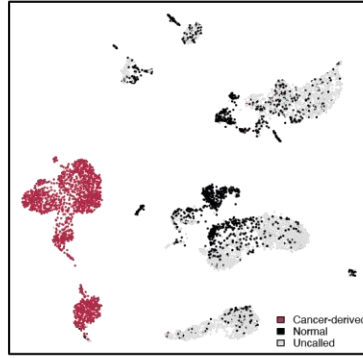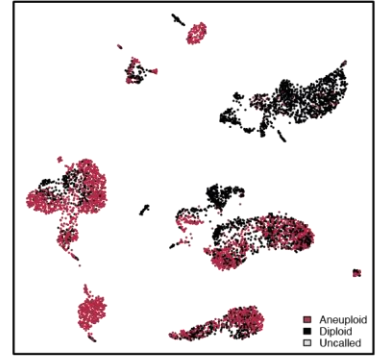

UMAP 2

Ewing's Sarcoma

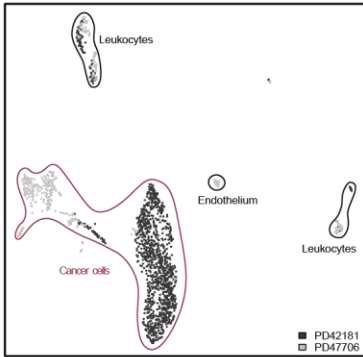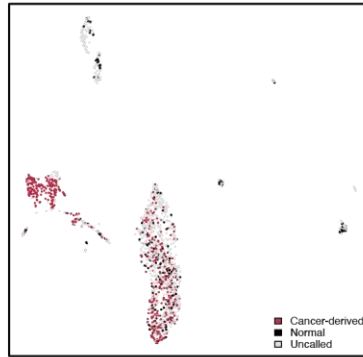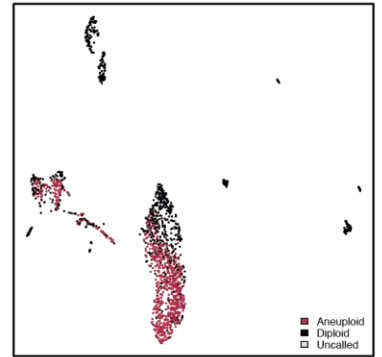

UMAP 2

Wilms Tumour

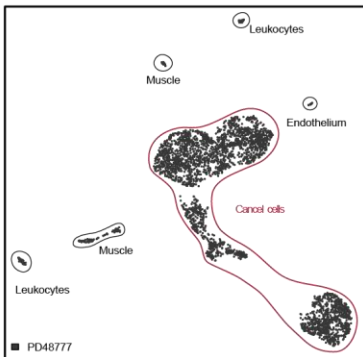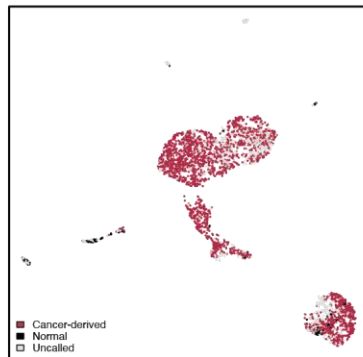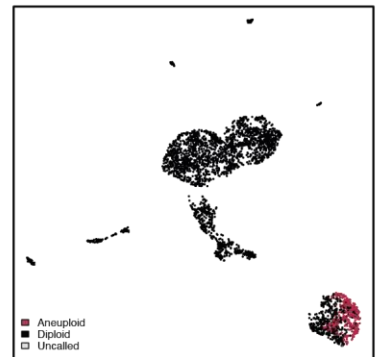

UMAP 2

Atypical Teratoid Rhabdoid Tumour

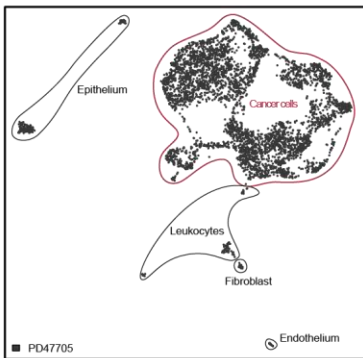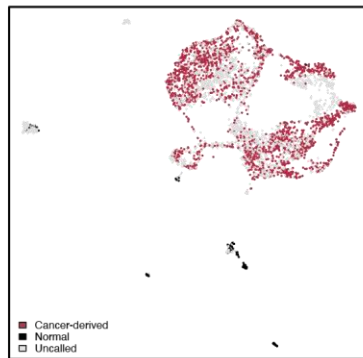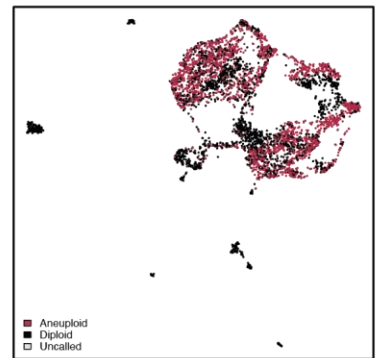

UMAP 2

UMAP 1

UMAP 1

UMAP 1

### **Supplementary Figure 1 – UMAPs of patients and cancer transcriptome calls**

Two-dimensional visualisation (using UMAP) of single cell transcriptomes from five different tumour types (rows), showing cell type annotation (left), calls made by alleleIntegrator (middle), and by CopyKAT (right).

Cancer cells

Proximal tubular cells  
(Normal tissue biopsies)

Leukocytes

PD35918

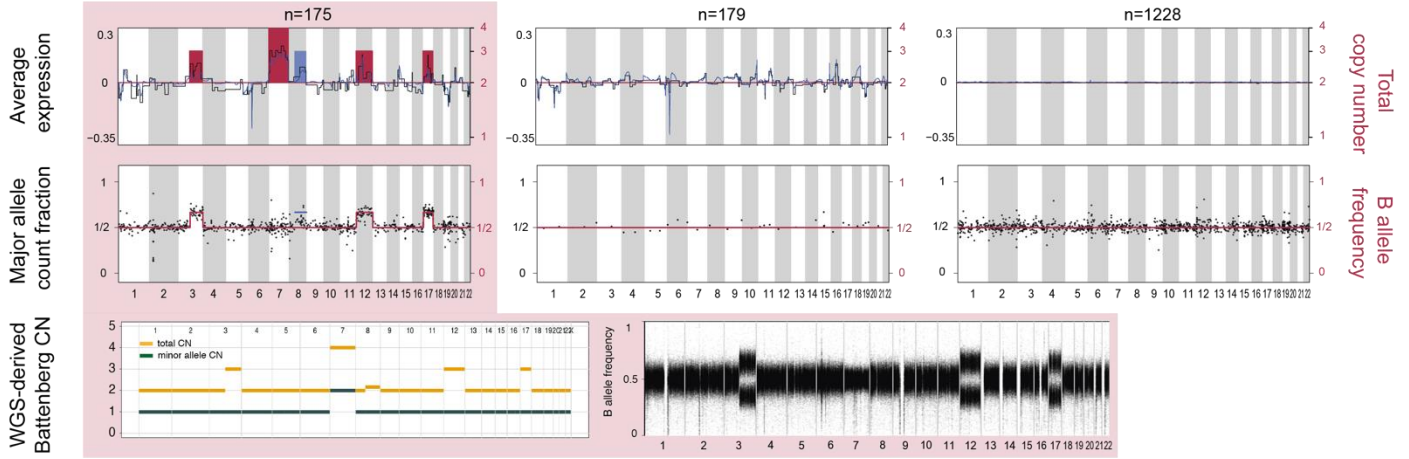

PD36793

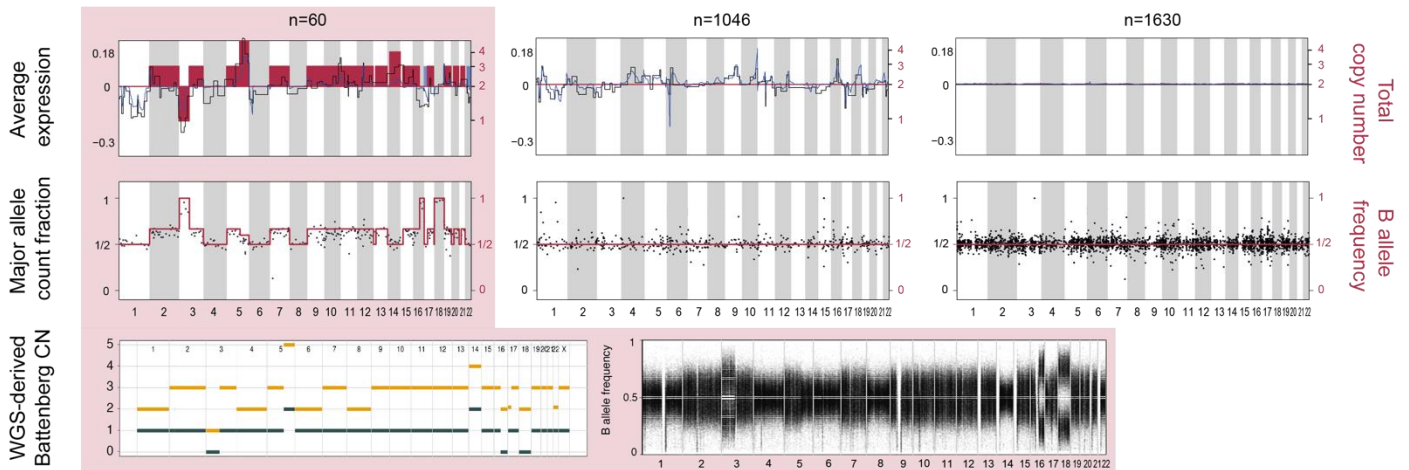

PD37104

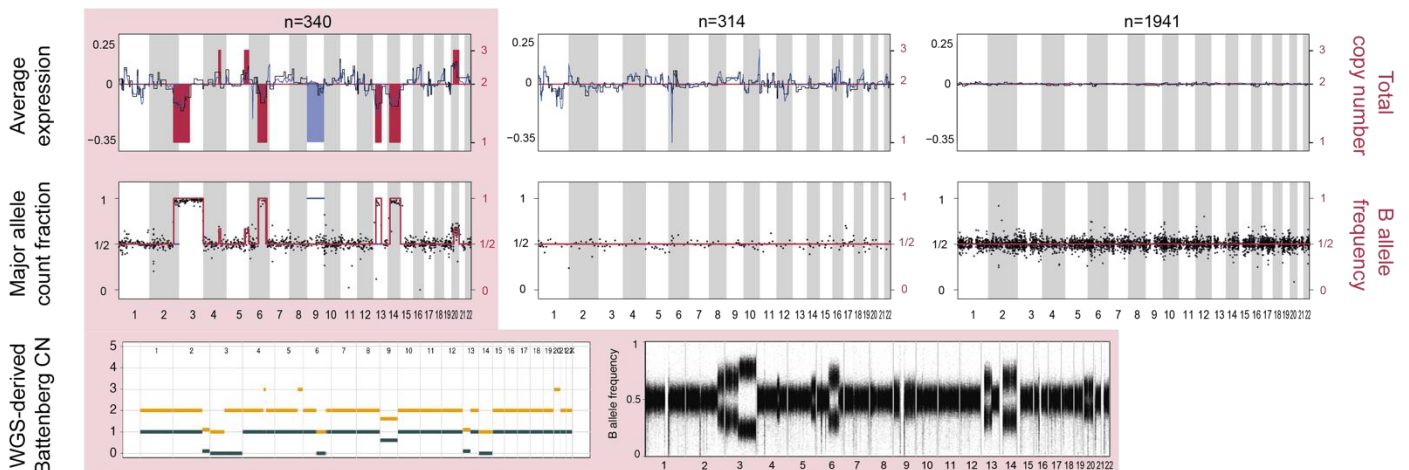

PD37228

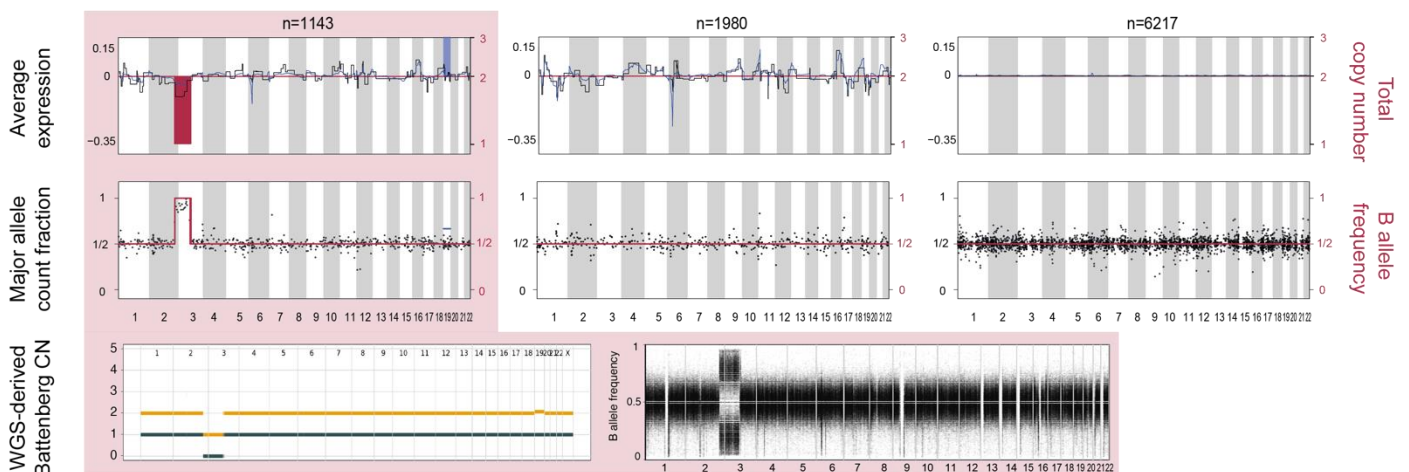

Total  
copy number  
B allele  
frequency

## Supplementary Figure 2 – Copy number profiles of renal cell carcinomas

Copy number profile for 5 renal cell carcinoma samples from normalised averaged expression ratio (top panels, solid black line for CopyKAT, solid blue line for inferCNV) and allelic ratio (middle panel, one dot per bin with ~500 reads), with ground truth from whole genome sequencing (WGS) (red, arbitrary scale in top panel). Sub-clonal copy number changes shown in blue.

Bottom panel of each sample shows the WGS-defined copy number changes by Battenberg (green line represents the minor allele copy number state, yellow line represents total copy number state), and the corresponding WGS-defined B allele frequency.

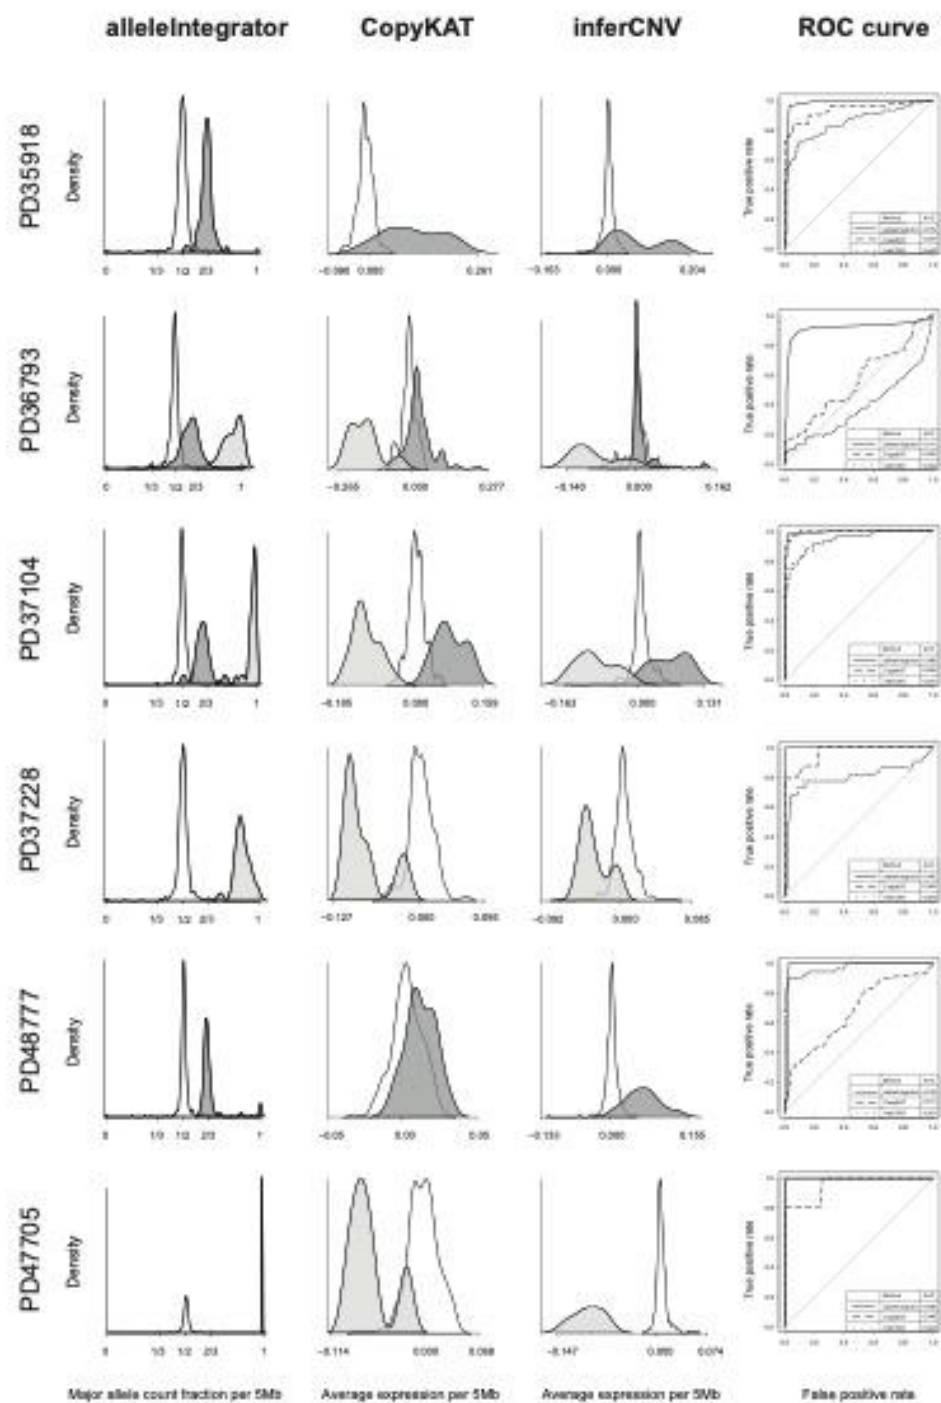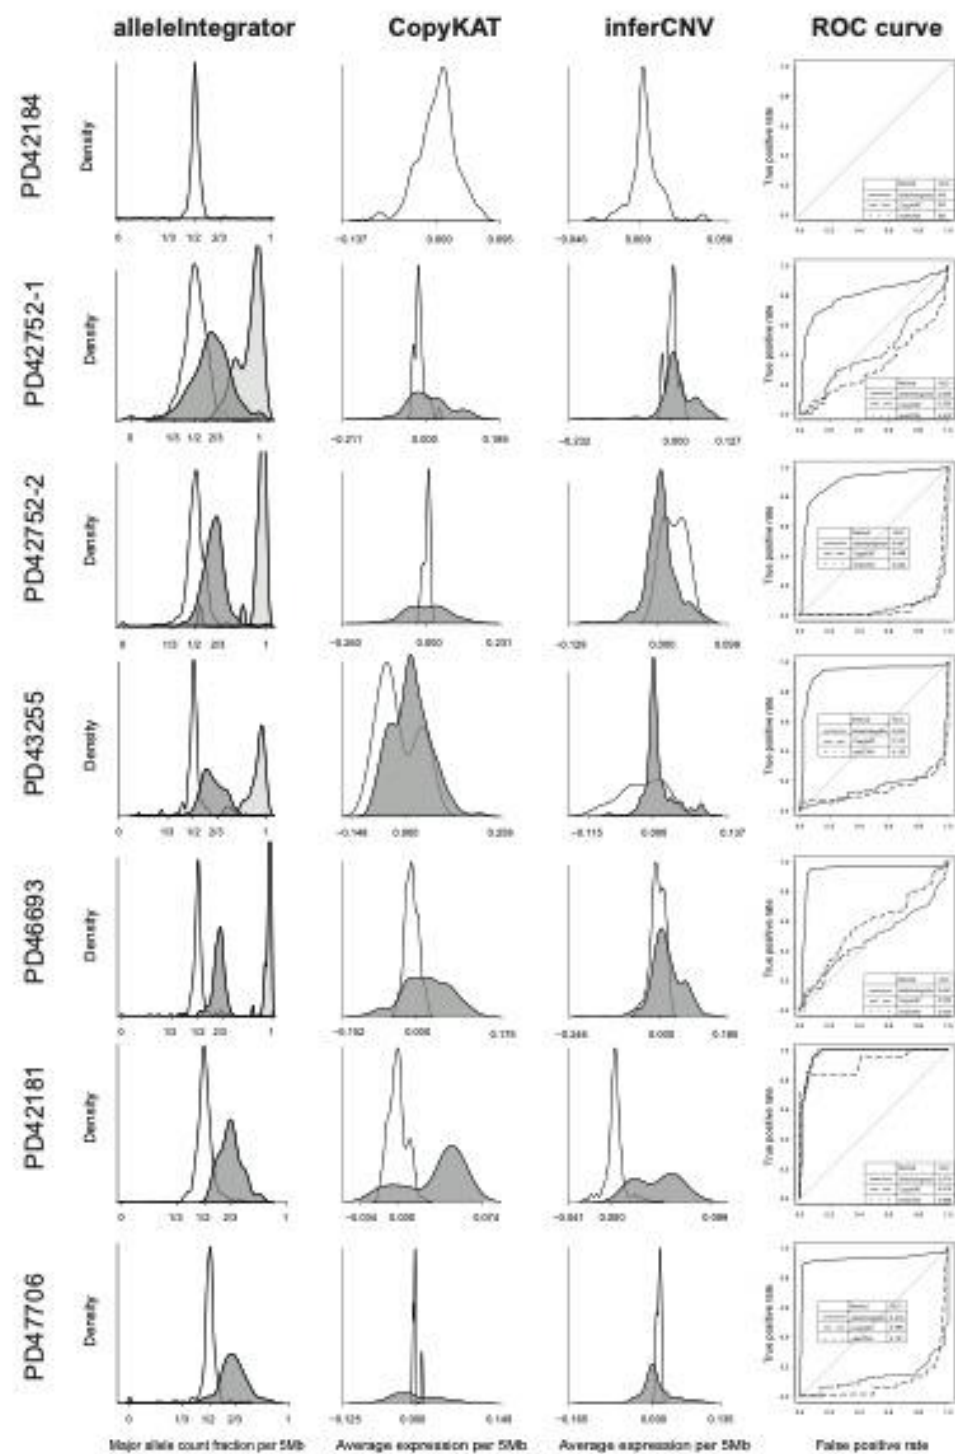

### **Supplementary Figure 3 – Copy number profile evaluation by individual**

For each individual (rows), the distribution of allelic ratios (left column) and expression ratios (middle columns) in 5 megabase bins, generated using alleleIntegrator, CopyKAT, and inferCNV, sequentially from the left. Each plot is colour coded by regions with copy number gains (dark shading), losses (light shading), or no change (white). The rightmost column displays a receiver operating characteristic (ROC) curve showing the sensitivity and specificity with which each method recovers the ground truth.



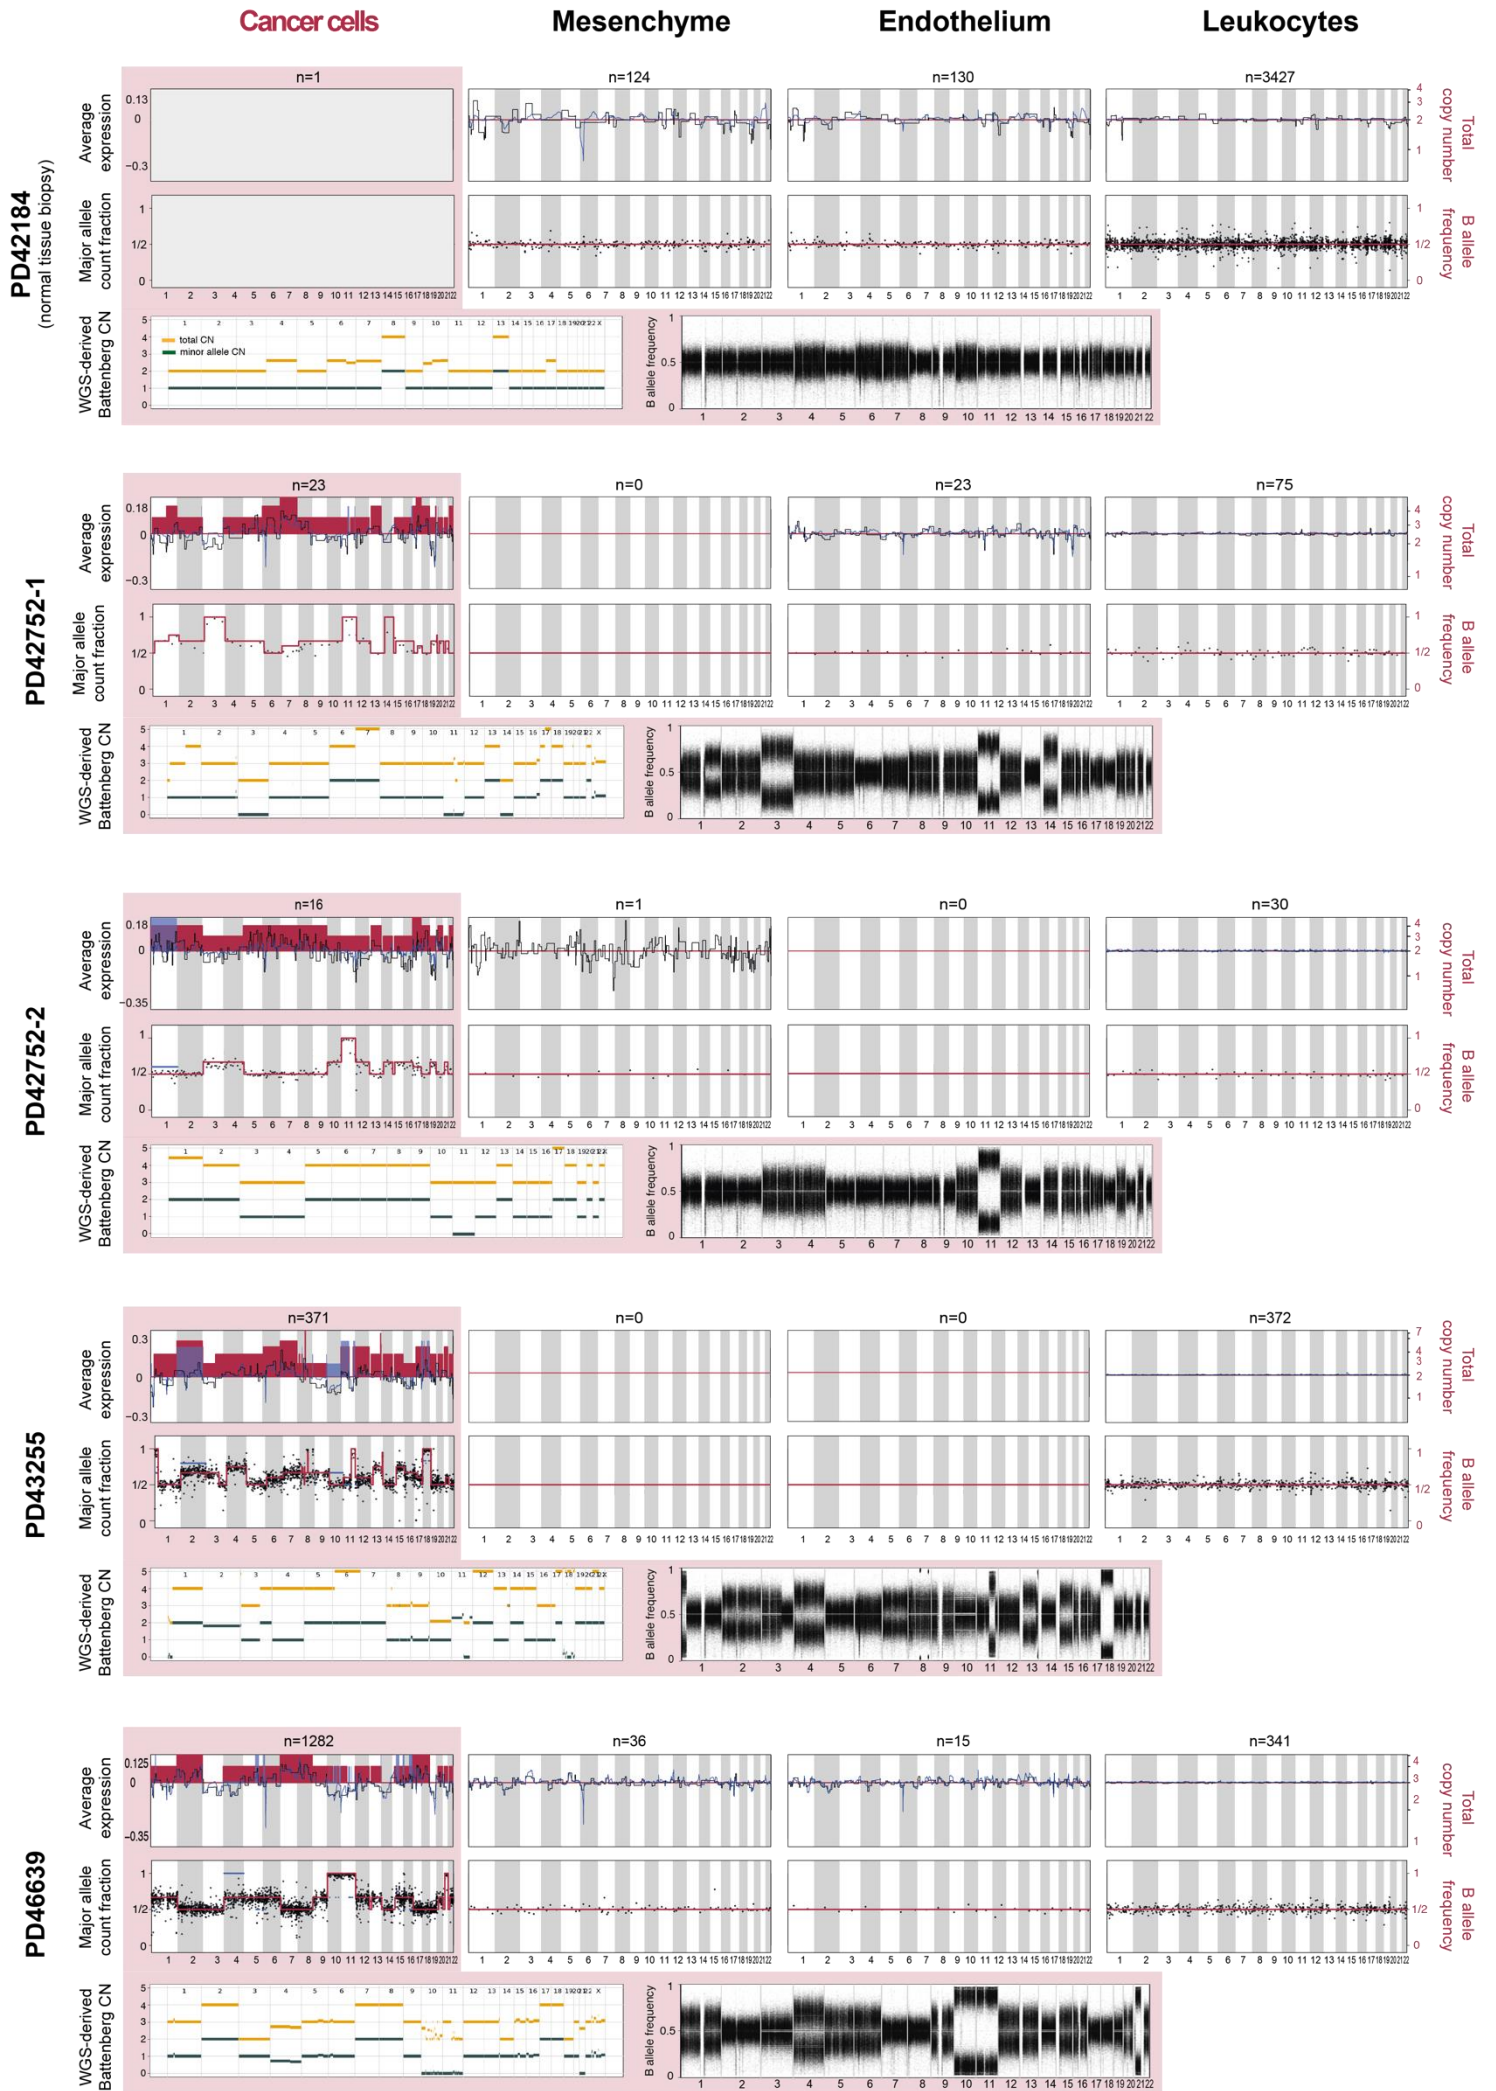

**Supplementary Figure 4 – Copy number profiles of neuroblastomas**

As per **Supplementary Figure 2** but for neuroblastoma.

**PD47705**

(Atypical Teratoid Rhabdoid Tumour)

**Cancer cells**

**Endothelium**

**Leukocytes**

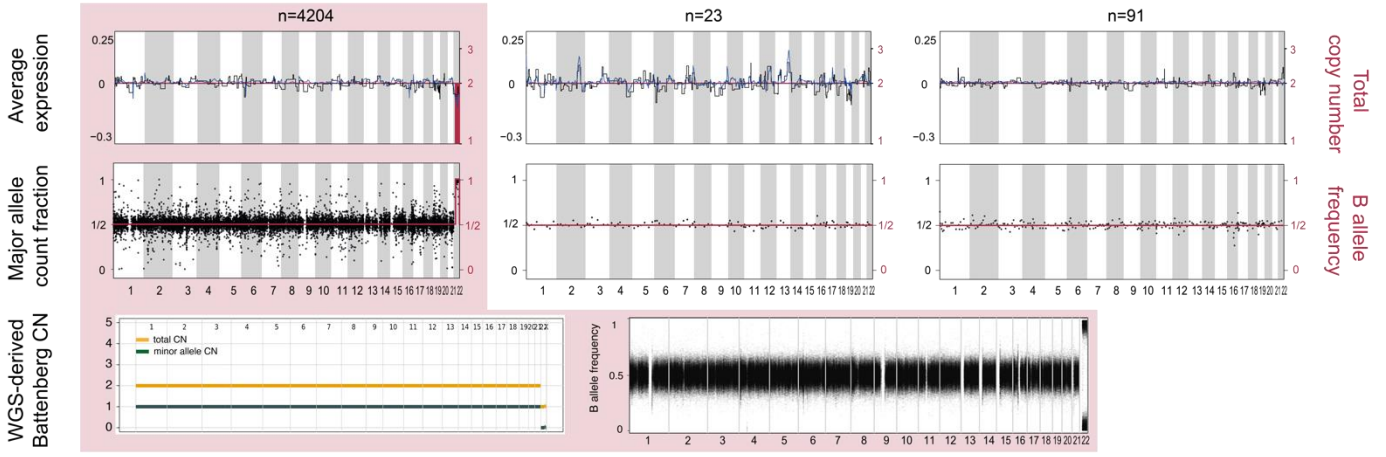

**PD47706**

(Ewing's Sarcoma)

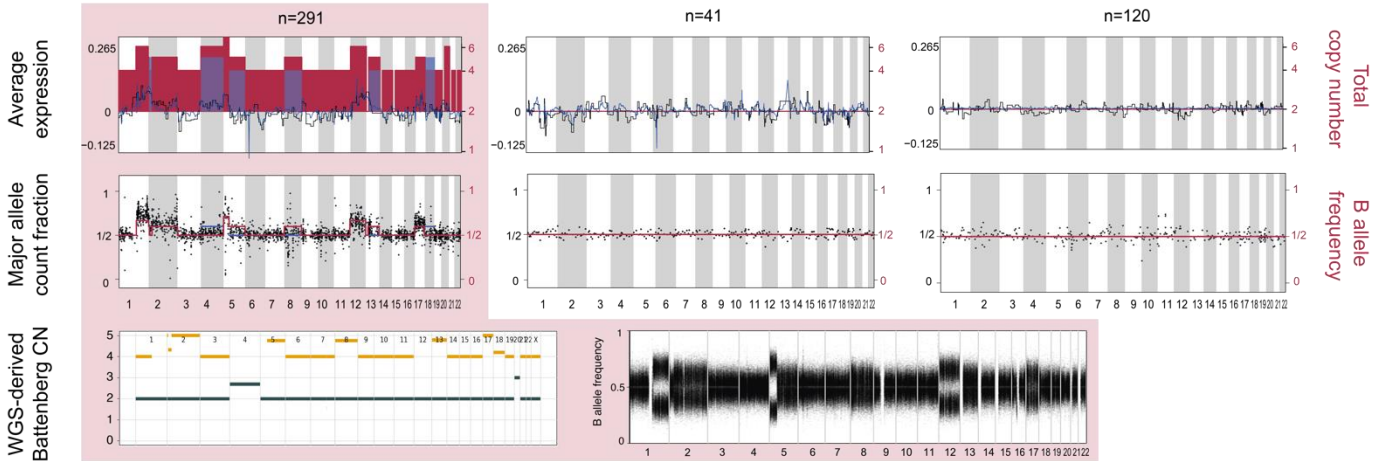

**PD42181**

(Ewing's Sarcoma)

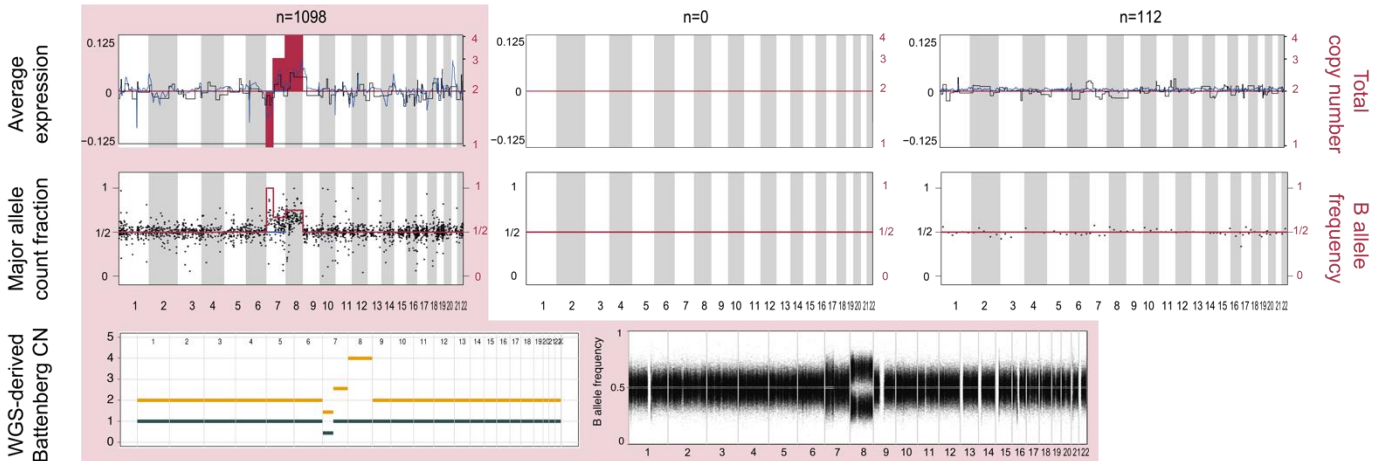

**PD48777**

(Wilms Tumour)

**Cancer cells**

**Muscle**

**Leukocytes**

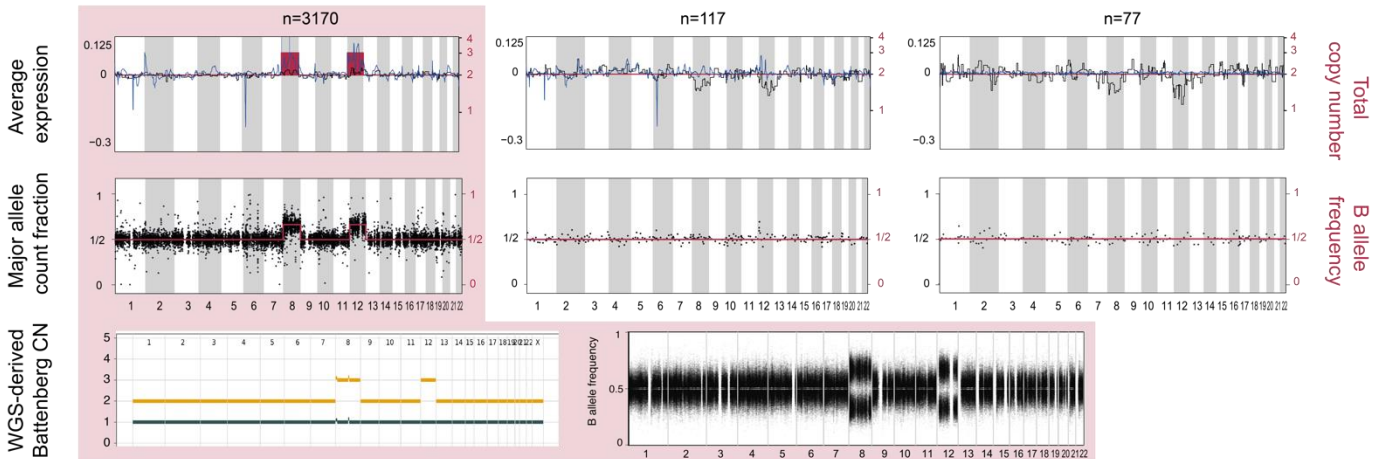

**Supplementary Figure 5 – Copy number profiles of Wilms tumour, Ewing’s, and AT/RT**

As per **Supplementary Figure 2** but for Wilms tumour, Ewing’s sarcoma, and atypical teratoid rhabdoid tumour.

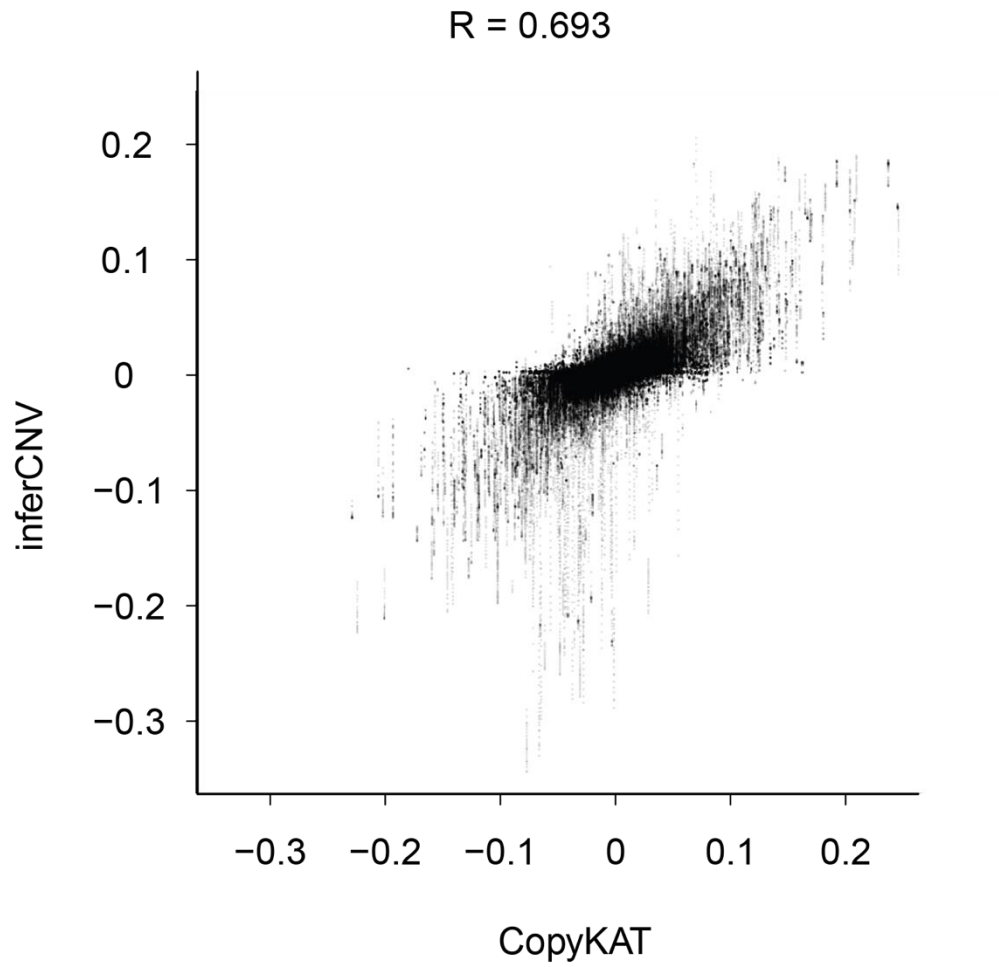

**Supplementary Figure 6 – Correlation of inferCNV and CopyKAT output**

Scatter plot showing the relationship between the CopyKAT (x-axis) and inferCNV (y-axis) output values, averaged in 5 megabase bins. The value in the top-left gives the Pearson correlation coefficient.

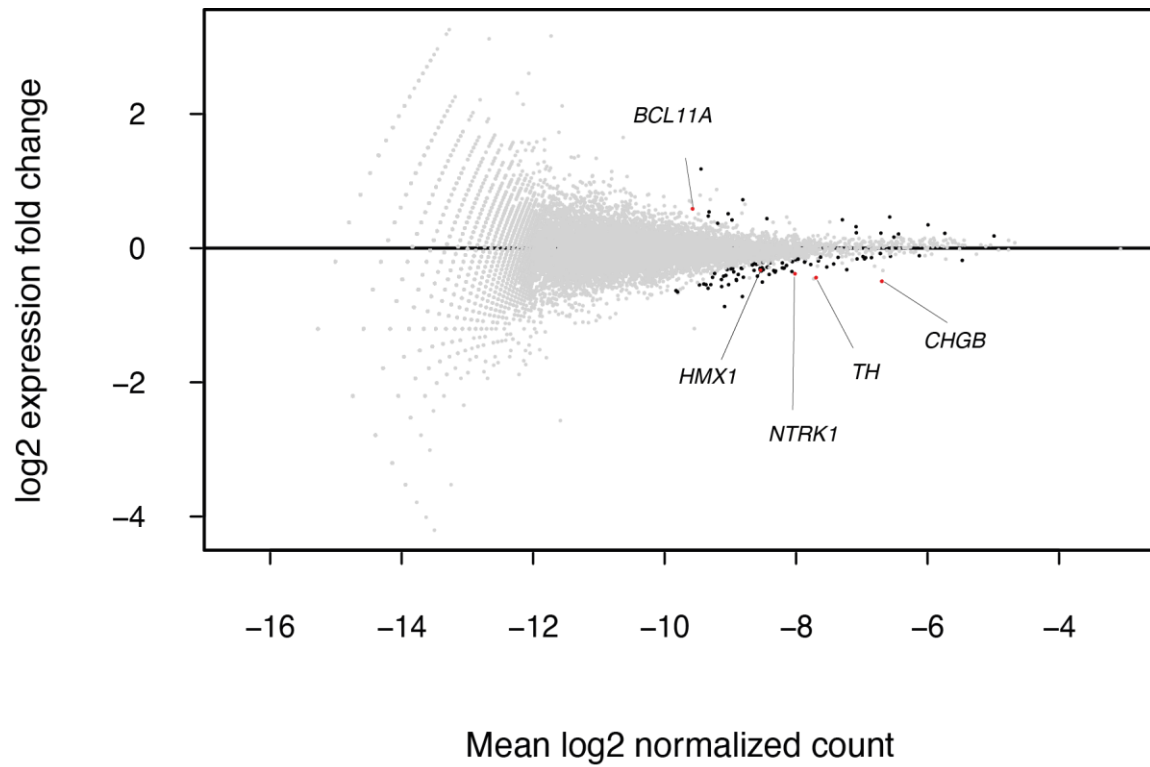

**Supplementary Figure 7 – Differential expression between PD46693 major and minor clones**

Log fold change (y-axis) for each gene (points) by average normalised expression (x-axis), with differentially expressed genes/transcription factors shown in black.

## Supplementary Tables

| <b>Patient ID</b> | <b>Disease type</b>               | <b>Biopsy type</b> | <b>Source</b>                            |
|-------------------|-----------------------------------|--------------------|------------------------------------------|
| PD35918           | Renal cell carcinoma              | Normal             | Young, M. D. et al., 2018 <sup>1</sup>   |
| PD35918           | Renal cell carcinoma              | Tumour             | Young, M. D. et al., 2018 <sup>1</sup>   |
| PD37228           | Renal cell carcinoma              | Normal             | Young, M. D. et al., 2018 <sup>1</sup>   |
| PD37228           | Renal cell carcinoma              | Tumour             | Young, M. D. et al., 2018 <sup>1</sup>   |
| PD37104           | Renal cell carcinoma              | Normal             | Young, M. D. et al., 2018 <sup>1</sup>   |
| PD37104           | Renal cell carcinoma              | Tumour             | Young, M. D. et al., 2018 <sup>1</sup>   |
| PD36793           | Renal cell carcinoma              | Normal             | Young, M. D. et al., 2018 <sup>1</sup>   |
| PD36793           | Renal cell carcinoma              | Tumour             | Young, M. D. et al., 2018 <sup>1</sup>   |
| PD42184           | Neuroblastoma                     | Normal             | Kildisiute, G. et al., 2021 <sup>2</sup> |
| PD42752-1         | Neuroblastoma                     | Tumour             | Kildisiute, G. et al., 2021 <sup>2</sup> |
| PD42752-2         | Neuroblastoma                     | Tumour             | Kildisiute, G. et al., 2021 <sup>2</sup> |
| PD46693           | Neuroblastoma                     | Tumour             | Kildisiute, G. et al., 2021 <sup>2</sup> |
| PD43255           | Neuroblastoma                     | Tumour             | Kildisiute, G. et al., 2021 <sup>2</sup> |
| PD48777           | Wilms tumour                      | Tumour             | Young, M. D. et al., 2021 <sup>3</sup>   |
| PD47705           | Atypical teratoid rhabdoid tumour | Tumour             | This study, EGAD00001009005              |
| PD42181           | Ewing's sarcoma                   | Tumour             | This study, EGAD00001009005              |
| PD47706           | Ewing's sarcoma                   | Tumour             | This study, EGAD00001009005              |

### **Supplementary Table 1 – Sample manifest**

A table linking sample IDs to their metadata.



| gene         | baseMean  | log2FoldChange | lfcSE     | stat       | pvalue    | padj      | sig  |
|--------------|-----------|----------------|-----------|------------|-----------|-----------|------|
| HES4         | 0.8253738 | -0.4477104     | 0.1117724 | -4.005553  | 6.19E-05  | 0.0060718 | TRUE |
| HMG2         | 5.8759454 | -0.3009108     | 0.0839695 | -3.583573  | 3.39E-04  | 0.0169118 | TRUE |
| NUDC         | 1.4732091 | 0.2489479      | 0.0723027 | 3.4431327  | 5.75E-04  | 0.0245341 | TRUE |
| TMEM59       | 2.637107  | 0.200375       | 0.0621226 | 3.2254757  | 0.0012576 | 0.0417138 | TRUE |
| RPL5         | 8.6186412 | -0.2036441     | 0.0532526 | -3.8241191 | 1.31E-04  | 0.0087812 | TRUE |
| CKS1B        | 1.3903648 | -0.4285162     | 0.1223202 | -3.5032337 | 4.60E-04  | 0.020197  | TRUE |
| NTRK1        | 2.147035  | 0.4380721      | 0.0955862 | 4.5830036  | 4.58E-06  | 0.0013494 | TRUE |
| RGS4         | 0.8592059 | 0.5968772      | 0.1630565 | 3.6605549  | 2.52E-04  | 0.0148183 | TRUE |
| ATP1B1       | 2.9103937 | 0.2895028      | 0.0805064 | 3.5960218  | 3.23E-04  | 0.0167372 | TRUE |
| BCL11A       | 0.6173239 | -0.5659022     | 0.1442805 | -3.9222359 | 8.77E-05  | 0.0071744 | TRUE |
| COX5B        | 6.1128152 | 0.1568272      | 0.0405295 | 3.8694593  | 1.09E-04  | 0.0080281 | TRUE |
| RND3         | 0.9053124 | -0.409618      | 0.1259249 | -3.2528743 | 0.0011424 | 0.0395688 | TRUE |
| ORMDL1       | 1.3591736 | 0.2492442      | 0.0782012 | 3.1872196  | 0.0014365 | 0.045473  | TRUE |
| TMEFF2       | 1.3631924 | 0.3695228      | 0.101376  | 3.6450712  | 2.67E-04  | 0.015431  | TRUE |
| ITM2C        | 1.8509359 | 0.3274491      | 0.0791724 | 4.1359001  | 3.54E-05  | 0.0041934 | TRUE |
| ECEL1        | 1.5043682 | 0.4077567      | 0.0989572 | 4.1205378  | 3.78E-05  | 0.00428   | TRUE |
| RAMP1        | 5.7444115 | 0.1716878      | 0.0529584 | 3.2419371  | 0.0011872 | 0.040641  | TRUE |
| GATA2        | 0.8563014 | 0.4728011      | 0.1330183 | 3.5544059  | 3.79E-04  | 0.0182834 | TRUE |
| HMX1         | 1.1620017 | 0.3751426      | 0.1113263 | 3.3697572  | 7.52E-04  | 0.0307625 | TRUE |
| CCNI         | 5.8631001 | -0.2307558     | 0.0586053 | -3.9374556 | 8.24E-05  | 0.0069268 | TRUE |
| HSD17B11     | 0.6296871 | -0.3977966     | 0.1135235 | -3.5040912 | 4.58E-04  | 0.020197  | TRUE |
| SPP1         | 1.3749537 | -0.8205298     | 0.1849113 | -4.4374241 | 9.10E-06  | 0.0017954 | TRUE |
| NAP1L5       | 0.6963927 | 0.8258064      | 0.0969394 | 8.5187891  | 1.61E-17  | 4.75E-14  | TRUE |
| GRIA2        | 0.7755683 | 0.4945109      | 0.1237505 | 3.99603    | 6.44E-05  | 0.0061172 | TRUE |
| TENM3        | 0.8640558 | -0.5113776     | 0.1308792 | -3.9072497 | 9.34E-05  | 0.0074278 | TRUE |
| BASP1        | 10.403841 | -0.1858031     | 0.0484627 | -3.8339389 | 1.26E-04  | 0.008634  | TRUE |
| EDIL3        | 0.5796694 | 0.5548026      | 0.1250569 | 4.4364006  | 9.15E-06  | 0.0017954 | TRUE |
| PAM          | 0.4459023 | 0.4951133      | 0.1484599 | 3.334996   | 8.53E-04  | 0.0334309 | TRUE |
| CAMK4        | 0.7884342 | 0.3390501      | 0.1052747 | 3.2206242  | 0.0012791 | 0.0418414 | TRUE |
| GFRA3        | 1.7573593 | 0.2547571      | 0.0736544 | 3.4588169  | 5.43E-04  | 0.0234894 | TRUE |
| NDFIP1       | 3.0502333 | 0.2244127      | 0.0581966 | 3.8561166  | 1.15E-04  | 0.0080752 | TRUE |
| CANX         | 1.0366419 | 0.3011137      | 0.0925487 | 3.2535697  | 0.0011396 | 0.0395688 | TRUE |
| HIST1H4C     | 8.6883692 | -0.4200807     | 0.1186053 | -3.5418384 | 3.97E-04  | 0.0185682 | TRUE |
| TUBB         | 20.290442 | -0.1934457     | 0.0501003 | -3.8611719 | 1.13E-04  | 0.0080752 | TRUE |
| HSPA1A       | 1.1411987 | 0.5349498      | 0.1471919 | 3.6343701  | 2.79E-04  | 0.0157765 | TRUE |
| HSPA1B       | 0.628758  | 0.555954       | 0.1708593 | 3.2538714  | 0.0011384 | 0.0395688 | TRUE |
| CDC5L        | 0.797059  | 0.4361822      | 0.1017803 | 4.2855281  | 1.82E-05  | 0.0026835 | TRUE |
| RP3-525N10.2 | 1.8252654 | 0.3073796      | 0.0951067 | 3.2319453  | 0.0012295 | 0.0416053 | TRUE |
| SEC63        | 0.9279419 | 0.4061351      | 0.0940798 | 4.316919   | 1.58E-05  | 0.0024516 | TRUE |
| NCOA7        | 1.6574015 | 0.365465       | 0.0860142 | 4.2488916  | 2.15E-05  | 0.0028753 | TRUE |
| NDUFA4       | 6.9138012 | 0.159141       | 0.0422514 | 3.7665298  | 1.66E-04  | 0.0105941 | TRUE |
| RAMP3        | 0.6781477 | 0.5602232      | 0.1058501 | 5.2926112  | 1.21E-07  | 7.10E-05  | TRUE |
| DDC          | 1.1975783 | 0.3001319      | 0.0943018 | 3.182674   | 0.0014592 | 0.0457015 | TRUE |
| VSTM2A       | 1.9723473 | 0.3165741      | 0.0788356 | 4.015622   | 5.93E-05  | 0.0060718 | TRUE |
| HSPB1        | 6.4576771 | 0.2247478      | 0.0577539 | 3.891473   | 9.96E-05  | 0.0077193 | TRUE |
| NRCAM        | 0.7717933 | 0.3972158      | 0.1102222 | 3.6037724  | 3.14E-04  | 0.0167372 | TRUE |
| EXOC4        | 1.6527206 | 0.4501881      | 0.1140501 | 3.9472843  | 7.90E-05  | 0.0068442 | TRUE |

|         |           |            |           |            |           |           |      |
|---------|-----------|------------|-----------|------------|-----------|-----------|------|
| TMSB4X  | 46.249748 | -0.1504748 | 0.0421414 | -3.5707114 | 3.56E-04  | 0.0174684 | TRUE |
| PCSK1N  | 9.4854987 | 0.1586586  | 0.0484032 | 3.2778506  | 0.001046  | 0.0384931 | TRUE |
| DUSP26  | 1.1813755 | 0.3773431  | 0.0871979 | 4.3274326  | 1.51E-05  | 0.0024516 | TRUE |
| NDUFB9  | 4.1439026 | 0.1694863  | 0.044991  | 3.7671164  | 1.65E-04  | 0.0105941 | TRUE |
| VCP     | 0.9074799 | 0.3200255  | 0.0901912 | 3.548303   | 3.88E-04  | 0.0184105 | TRUE |
| GOLM1   | 1.0384772 | 0.3246282  | 0.0901599 | 3.6005833  | 3.18E-04  | 0.0167372 | TRUE |
| SPTAN1  | 1.4877743 | 0.3662087  | 0.0822526 | 4.4522449  | 8.50E-06  | 0.0017954 | TRUE |
| DBH     | 3.4470086 | 0.3259419  | 0.078052  | 4.1759584  | 2.97E-05  | 0.0037982 | TRUE |
| TH      | 2.9677261 | 0.4255725  | 0.0754896 | 5.6374969  | 1.73E-08  | 1.69E-05  | TRUE |
| CD44    | 1.2290094 | 0.4767816  | 0.0963983 | 4.9459548  | 7.58E-07  | 3.19E-04  | TRUE |
| FKBP2   | 1.2098143 | 0.2581147  | 0.0789477 | 3.2694401  | 0.0010776 | 0.0391663 | TRUE |
| CADM1   | 2.2422979 | 0.2486676  | 0.0669907 | 3.7119709  | 2.06E-04  | 0.0128817 | TRUE |
| SLC18A2 | 0.6418574 | 0.5022565  | 0.1294599 | 3.8796295  | 1.05E-04  | 0.0078971 | TRUE |
| RGS10   | 0.6119829 | -0.9576624 | 0.1485281 | -6.4476863 | 1.14E-10  | 1.67E-07  | TRUE |
| CD9     | 1.5324888 | 0.3859138  | 0.0976675 | 3.9513019  | 7.77E-05  | 0.0068442 | TRUE |
| NELL2   | 0.6436465 | 0.4259095  | 0.1158716 | 3.6757021  | 2.37E-04  | 0.014548  | TRUE |
| TUBA1B  | 15.310965 | -0.3572856 | 0.0728195 | -4.9064578 | 9.27E-07  | 3.41E-04  | TRUE |
| PRPH    | 4.3624368 | -0.3359695 | 0.0833599 | -4.0303502 | 5.57E-05  | 0.0060718 | TRUE |
| FAIM2   | 1.892397  | 0.3262801  | 0.0676517 | 4.8229435  | 1.41E-06  | 4.63E-04  | TRUE |
| HSP90B1 | 1.4203509 | 0.406519   | 0.1020029 | 3.9853661  | 6.74E-05  | 0.0061986 | TRUE |
| COX6A1  | 8.1570732 | 0.1169433  | 0.0364978 | 3.2041205  | 0.0013548 | 0.0433522 | TRUE |
| MYCBP2  | 0.9100619 | 0.3393452  | 0.1040627 | 3.2609691  | 0.0011103 | 0.0395688 | TRUE |
| DAD1    | 0.83115   | 0.3596553  | 0.0869939 | 4.1342605  | 3.56E-05  | 0.0041934 | TRUE |
| PSME2   | 0.60898   | 0.3716209  | 0.1034003 | 3.5940022  | 3.26E-04  | 0.0167372 | TRUE |
| EGLN3   | 0.3995463 | 0.5068218  | 0.148344  | 3.4165314  | 6.34E-04  | 0.0264981 | TRUE |
| CHGA    | 1.9369055 | 0.4151369  | 0.0956949 | 4.3381301  | 1.44E-05  | 0.0024516 | TRUE |
| IFI27   | 0.7784338 | 0.6041944  | 0.1723234 | 3.5061648  | 4.55E-04  | 0.020197  | TRUE |
| PPP2R5C | 0.7374246 | 0.4364171  | 0.108882  | 4.0081654  | 6.12E-05  | 0.0060718 | TRUE |
| PDIA3   | 1.8062253 | 0.3451641  | 0.081237  | 4.2488537  | 2.15E-05  | 0.0028753 | TRUE |
| ANXA2   | 6.245134  | 0.1718011  | 0.0521338 | 3.2953894  | 9.83E-04  | 0.0366269 | TRUE |
| HACD3   | 1.3302982 | 0.3683997  | 0.1006156 | 3.6614557  | 2.51E-04  | 0.0148183 | TRUE |
| RPS17   | 10.169854 | -0.1474088 | 0.0457124 | -3.2246997 | 0.001261  | 0.0417138 | TRUE |
| SEZ6L2  | 1.3528829 | 0.2519862  | 0.0755579 | 3.3350068  | 8.53E-04  | 0.0334309 | TRUE |
| TPPP3   | 0.8209401 | 0.4733391  | 0.1305128 | 3.6267649  | 2.87E-04  | 0.0159417 | TRUE |
| RPAIN   | 2.25447   | 0.2031108  | 0.0615939 | 3.297581   | 9.75E-04  | 0.0366269 | TRUE |
| PMP22   | 4.738986  | 0.3511181  | 0.0801134 | 4.3827629  | 1.17E-05  | 0.0021562 | TRUE |
| SCPEP1  | 0.5974893 | 0.5184787  | 0.1141952 | 4.5402838  | 5.62E-06  | 0.0015035 | TRUE |
| MXRA7   | 1.1214389 | 0.2798657  | 0.0832684 | 3.3610089  | 7.77E-04  | 0.0313186 | TRUE |
| TIMP2   | 1.555492  | 0.3126524  | 0.0939072 | 3.3293776  | 8.70E-04  | 0.0334309 | TRUE |
| PMAIP1  | 1.3452775 | 0.5443707  | 0.1216577 | 4.4746098  | 7.66E-06  | 0.0017954 | TRUE |
| NOP56   | 1.1384061 | 0.311682   | 0.0912825 | 3.414475   | 6.39E-04  | 0.0264981 | TRUE |
| CHGB    | 8.2511448 | 0.4336243  | 0.0808784 | 5.3614343  | 8.26E-08  | 6.08E-05  | TRUE |
| SNAP25  | 2.6102838 | 0.2297737  | 0.0652018 | 3.5240405  | 4.25E-04  | 0.0195509 | TRUE |
| PHF20   | 0.7606434 | -0.323262  | 0.1008685 | -3.2047868 | 0.0013516 | 0.0433522 | TRUE |
| ATP5D   | 2.2712189 | 0.1909267  | 0.057368  | 3.3281071  | 8.74E-04  | 0.0334309 | TRUE |
| UOCR11  | 3.1146963 | 0.1705986  | 0.0540879 | 3.1541001  | 0.0016099 | 0.0498912 | TRUE |
| MT-ND1  | 16.64741  | 0.1653614  | 0.0460522 | 3.5907398  | 3.30E-04  | 0.0167372 | TRUE |
| MT-CO3  | 33.082217 | 0.2462432  | 0.0489132 | 5.0342876  | 4.80E-07  | 2.35E-04  | TRUE |

**Supplementary Table 2 – List of differentially expressed genes between PD46693 minor and major clone tumour cell population.**

Log2FoldChange is calculated as  $\log_2(\text{minor clone}/\text{major clone})$ . A positive log2FoldChange value indicates a higher expression level in the minor clone population.

| gene   | baseMean  | log2FoldChange | lfcSE      | stat       | pvalue    | padj      | sig  |
|--------|-----------|----------------|------------|------------|-----------|-----------|------|
| HES4   | 0.8253738 | -0.4477104     | 0.11117724 | -4.005553  | 6.19E-05  | 0.0040649 | TRUE |
| JUN    | 4.121573  | 0.2840566      | 0.0939382  | 3.0238658  | 0.0024957 | 0.0495569 | TRUE |
| BCL11A | 0.6173239 | -0.5659022     | 0.1442805  | -3.9222359 | 8.77E-05  | 0.0040649 | TRUE |
| GATA2  | 0.8563014 | 0.4728011      | 0.1330183  | 3.5544059  | 3.79E-04  | 0.0131645 | TRUE |
| HMX1   | 1.1620017 | 0.3751426      | 0.1113263  | 3.3697572  | 7.52E-04  | 0.0209152 | TRUE |
| ISL1   | 1.46513   | 0.2864101      | 0.0913407  | 3.1356239  | 0.0017149 | 0.0397283 | TRUE |
| CDC5L  | 0.797059  | 0.4361822      | 0.1017803  | 4.2855281  | 1.82E-05  | 0.002534  | TRUE |

**Supplementary Table 3 – List of transcription factors that are differentially expressed between PD46693 minor and major clone tumour cell population.**

Log2FoldChange is calculated as  $\log_2(\text{minor clone}/\text{major clone})$ . A positive log2FoldChange value indicates a higher expression level in the minor clone population.

## Supplementary References

1. Young, M. D. et al. Single-cell transcriptomes from human kidneys reveal the cellular identity of renal tumors. *Science* 361, 594–599 (2018).
2. Kildisiute, G. et al. Tumor to normal single-cell mRNA comparisons reveal a pan-neuroblastoma cancer cell. *Sci. Adv.* 7, eabd3311 (2021).
3. Young, M. D. et al. Single cell derived mRNA signals across human kidney tumors. *Nat. Commun.* 12, 1–19 (2021).
