# Supplementary material for: Precise identification of cancer cells from allelic imbalances in single cell transcriptomes
Source: PubMed Central journal article supplement (PMC9452529; doi:10.1038/s42003-022-03808-9), 2022-09-07
Supplement: 42003_2022_3808_MOESM2_ESM.pdf [file 42003_2022_3808_MOESM2_ESM.pdf]

## Description of Additional Supplementary Files

**File name:** Supplementary Data 1

**Description:** WGS-derived copy number profile per individual as identified by Battenberg.

**File name:** Supplementary Data 2

**Description:** Numerical values used in generating the figures in the manuscript.
